# Supplementary material for: Mesoporous silicabis(ethylsulfanyl)propane palladium catalysts for hydrogenation and one-pot two-step Suzuki cross-coupling followed by hydrogenation
Source: Royal Society of Chemistry journal article supplement (doi:10.1039/c1dt10589b), 2011-01-01
Supplement: c1dt10589b.pdf [file c1dt10589b.pdf]

Supplementary Information.

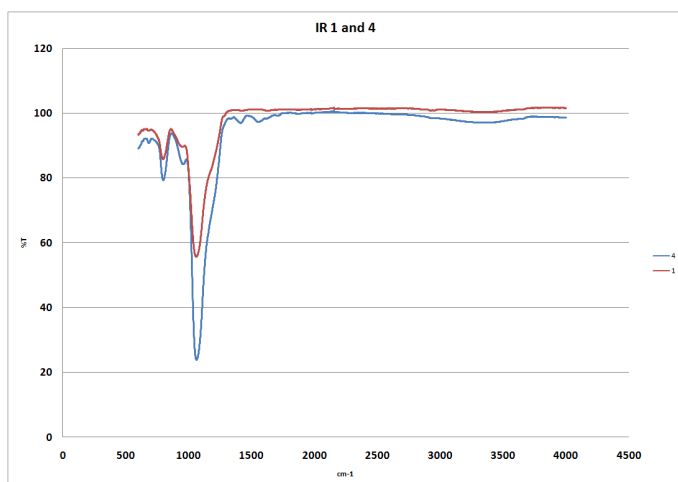

Supplementary Figure A: ATR-IR of **1** and **4**

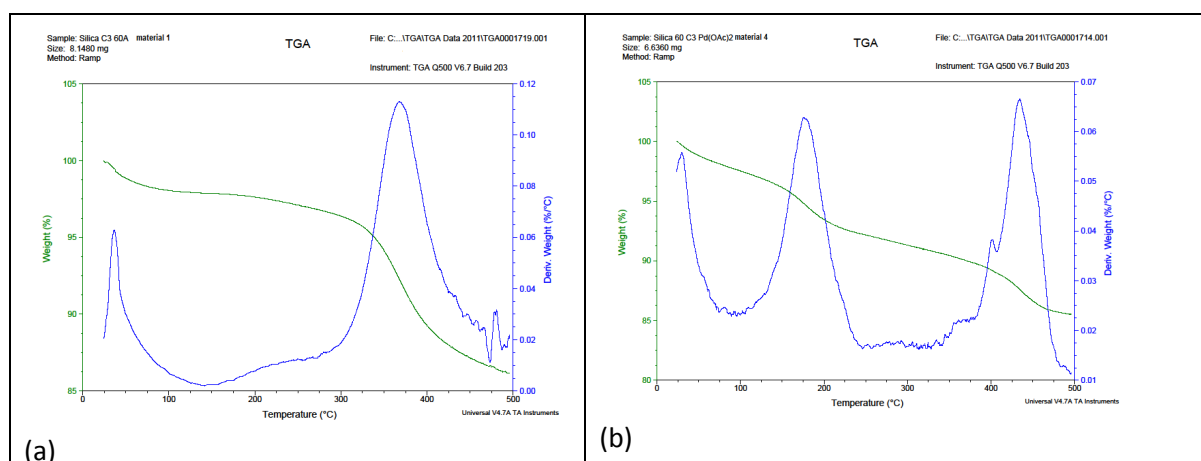

Supplementary Figure B: DTG of **1** (a) **4**(b)

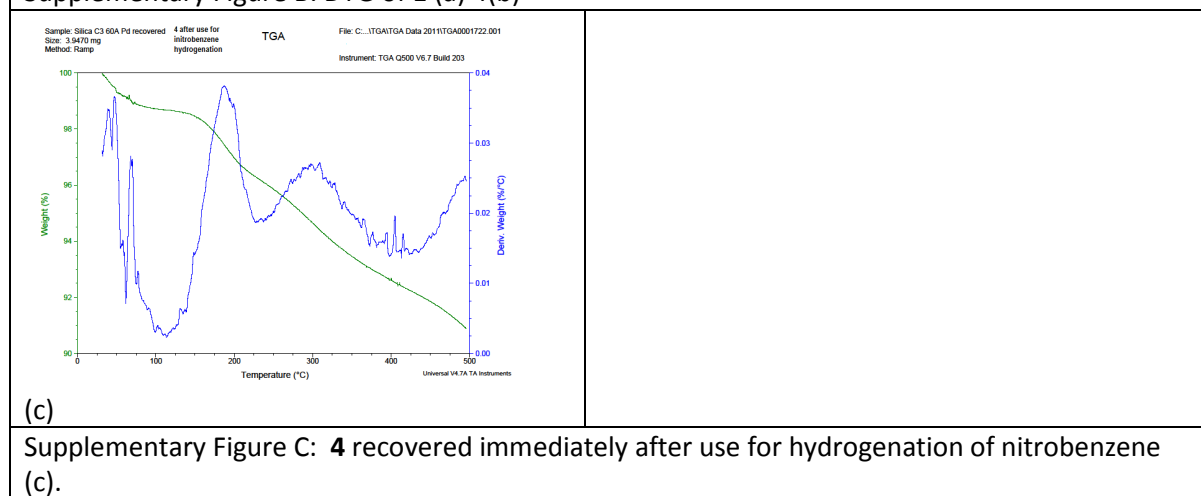

Supplementary Figure C: **4** recovered immediately after use for hydrogenation of nitrobenzene (c).
